# Supplementary material
Source: publisher figshare collection journal article supplement (https://karger.figshare.com/ndownloader/files/18004262)
Supplement: Supplementary file 1 [file 18004262]

## Supplementary Materials

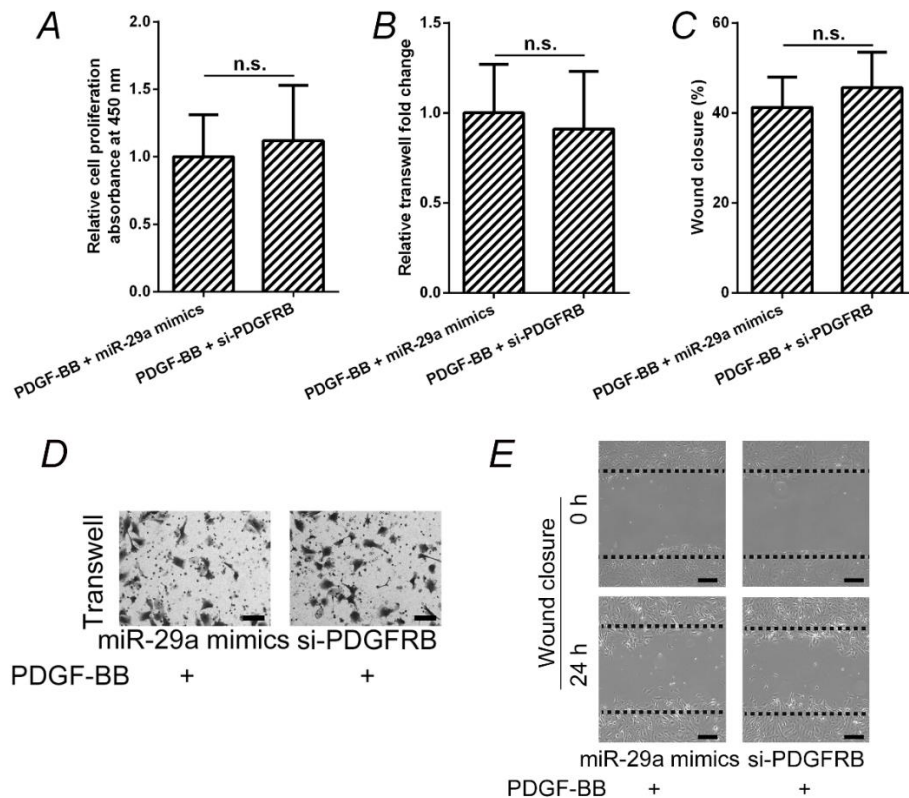

**Figure S1.** Inhibition of the expression of PDGFRB had similar effects on proliferation and migration. HASMCs were transfected with miR-29a mimics or si-PDGFRB for 24 h, followed by PDGF-BB stimulation for 24 h. HASMC proliferation was determined by cell counting kit-8 assay (A). HASMC migration was determined by Transwell assay (B and D) and wound closure assay (C and E). Scale bar: 100  $\mu$ m. Data are presented as mean  $\pm$  SD. n.s. means no significant difference between the indicated groups.

**Table S1. Baseline characteristics of subjects.**

|                          | ASO Patients (n=26) | Normal Control (n=20) |
|--------------------------|---------------------|-----------------------|
| Age (years)              | 61.4 $\pm$ 5.1      | 57.8 $\pm$ 6.3        |
| Male Gender              | 14 (53.8 %)         | 9 (45 %)              |
| BMI (kg/m <sup>2</sup> ) | 27.5 $\pm$ 3.3      | 28.3 $\pm$ 3.9        |
| Smoking                  | 9 (34.6 %)          | 8 (40 %)              |
| Hypertension             | 15 (57.7 %)         | 2 (10 %)              |
| Type 2 diabetes          | 12 (46.2 %)         | 4 (20 %)              |

Data are presented as mean  $\pm$  SD or n (percentage, %).
